# Supplementary material
Source: HighWire-hosted journal article supplement (http://cmaj.ca/highwire/filestream/150293/field_highwire_adjunct_files/0/221513-res-1-at.pdf)

## Supplementary Material

eTable 1. Data sources

| Outcome                                          | Database                                                                                                                                                                                                                                                                                                                           |
|--------------------------------------------------|------------------------------------------------------------------------------------------------------------------------------------------------------------------------------------------------------------------------------------------------------------------------------------------------------------------------------------|
| Palliative home care (provided by nonphysicians) | Home Care Database (HCD) using service recipient codes for Complex Care End of Life or End of Life (In-Home)                                                                                                                                                                                                                       |
| Palliative home visits provided by physicians    | Ontario Health Insurance Plan (OHIP) service fee codes                                                                                                                                                                                                                                                                             |
| Hospitalizations                                 | Canadian Institute for Health Information–Discharge Abstract Database (CIHI-DAD)                                                                                                                                                                                                                                                   |
| Emergency department (ED) visits                 | National Ambulatory Care Reporting System (NACRS)<br><br><b>n.b.</b> Scheduled ED visits and visits where the patient left without being seen by a service provider were excluded.                                                                                                                                                 |
| Long-term care home admission                    | Continuing Care Reporting System (CCRS)                                                                                                                                                                                                                                                                                            |
| Date of death                                    | Registered Persons Database                                                                                                                                                                                                                                                                                                        |
| Location of death                                | Acute care hospitals: CIHI-DAD, NACRS and Same Day Surgery Database<br><br>Long-term care home: CCRS<br><br>Other institutional care settings: Ontario Mental Health Reporting System and National Rehabilitation Reporting System<br><br>Community settings (i.e. outside of known institutional settings): OHIP Database and HCD |

eMethods 1. Derivation of RESPECT risk score and bin

**I. Cox Proportional Hazards Regression Model of 6-Month Mortality**

| Predictors                                                                                  | Derivation Cohort       |                 |
|---------------------------------------------------------------------------------------------|-------------------------|-----------------|
|                                                                                             | (N=405,689 assessments) |                 |
|                                                                                             | Hazard Ratio            | (95% CI)        |
| <b>Age</b>                                                                                  |                         |                 |
| First segment of the restricted cubic spline (RCS) of age                                   | 1.015                   | (1.010 - 1.020) |
| Second segment of the RCS of age                                                            | 0.996                   | (0.982 - 1.009) |
| Third segment of the RCS of age                                                             | 1.069                   | (0.963 - 1.188) |
| Fourth segment of the RCS of age                                                            | 1.043                   | (0.777 - 1.401) |
| <b>Sex</b>                                                                                  |                         |                 |
| Female                                                                                      | 1.000                   | (Reference)     |
| Male                                                                                        | 1.496                   | (1.460 - 1.532) |
| <b>Diseases</b>                                                                             |                         |                 |
| Stroke                                                                                      | 0.817                   | (0.792 - 0.844) |
| Congestive heart failure (CHF)                                                              | 1.458                   | (1.416 - 1.502) |
| Coronary heart disease (CHD)                                                                | 1.023                   | (0.998 - 1.049) |
| Alzheimer disease or other dementias                                                        | 0.936                   | (0.910 - 0.963) |
| Multiple sclerosis (MS)                                                                     | 0.578                   | (0.500 - 0.668) |
| Parkinson's                                                                                 | 0.838                   | (0.794 - 0.884) |
| <b>Signs and symptoms of health instability</b>                                             |                         |                 |
| Vomiting in at least 2 of the last 3 days                                                   | 1.397                   | (1.239 - 1.574) |
| Edema in at least 1 of the last 3 days                                                      | 1.045                   | (1.020 - 1.070) |
| Dyspnea (shortness of breath)                                                               | 1.226                   | (1.195 - 1.256) |
| Fluid intake less than four 8 oz cups per day (or less than 1000 cc per day) in last 3 days | 1.210                   | (1.162 - 1.259) |
| Weight loss of > 5% in the last 30 days or > 10% in the last 180 days                       | 1.461                   | (1.417 - 1.506) |
| Decrease in amount food or fluid usually consumed                                           | 1.420                   | (1.373 - 1.468) |
| <b>Prognosis of less than 6 months to live</b>                                              |                         |                 |
| No                                                                                          | 1.000                   | (Reference)     |
| Yes                                                                                         | 2.836                   | (2.718 - 2.959) |
| <b>No. of inpatient admissions (ED) over the past 90 days</b>                               |                         |                 |
| 0                                                                                           | 1.000                   | (Reference)     |
| 1                                                                                           | 1.275                   | (1.245 - 1.307) |
| 2                                                                                           | 1.451                   | (1.386 - 1.519) |
| 3+                                                                                          | 1.498                   | (1.399 - 1.603) |
| <b>No. of emergency department visits (ED) over past 90 days</b>                            |                         |                 |
| 0                                                                                           | 1.000                   | (Reference)     |
| 1                                                                                           | 1.120                   | (1.091 - 1.151) |
| 2                                                                                           | 1.247                   | (1.190 - 1.306) |
| 3+                                                                                          | 1.268                   | (1.197 - 1.344) |
| <b>Instrumental Activities of Daily Living (IADL) Difficulty scale</b>                      |                         |                 |
| 0 = Independent in performing ordinary housework, meal preparation or phone use             | 1.000                   | (Reference)     |
| 1                                                                                           | 1.021                   | (0.889 - 1.174) |
| 2                                                                                           | 1.032                   | (0.923 - 1.155) |
| 3                                                                                           | 1.065                   | (0.952 - 1.191) |
| 4                                                                                           | 1.229                   | (1.102 - 1.371) |
| 5                                                                                           | 1.420                   | (1.277 - 1.580) |
| 6 = Total dependence in performing ordinary housework, meal preparation or phone use        | 1.810                   | (1.623 - 2.018) |

**Activities of Daily Living (ADL) Self-performance Hierarchy scale**

Appendix 1, as supplied by the authors. Appendix to: Murmann M, Manuel DG, Tanuseputro P, et al. Estimated mortality risk and use of palliative care services among home care clients during the last 6 months of life: a retrospective cohort study. *CMAJ* 2024. doi: 10.1503/cmaj.221513. Copyright © 2024 The Author(s) or their employer(s). To receive this resource in an accessible format, please contact us at [cmajgroup@cmaj.ca](mailto:cmajgroup@cmaj.ca).

| Predictors                                                                                                       | Derivation Cohort       |                 |
|------------------------------------------------------------------------------------------------------------------|-------------------------|-----------------|
|                                                                                                                  | (N=405,689 assessments) |                 |
|                                                                                                                  | Hazard Ratio            | (95% CI)        |
| 0 = Independent in maintaining personal hygiene, toilet use, locomotion, and eating                              | 1.000                   | (Reference)     |
| 1                                                                                                                | 0.925                   | (0.888 - 0.964) |
| 2                                                                                                                | 1.065                   | (1.029 - 1.104) |
| 3                                                                                                                | 1.187                   | (1.144 - 1.231) |
| 4                                                                                                                | 1.575                   | (1.511 - 1.643) |
| 5                                                                                                                | 1.977                   | (1.896 - 2.061) |
| 6 = Total dependence in maintaining personal hygiene, toilet use, locomotion, and eating                         | 3.234                   | (3.027 - 3.456) |
| <b>Worsening ADL</b>                                                                                             |                         |                 |
| No                                                                                                               | 1.000                   | (Reference)     |
| Yes                                                                                                              | 1.417                   | (1.381 - 1.454) |
| <b>Cognitive skills for daily decision-making</b>                                                                |                         |                 |
| Worsening decision-making capacity                                                                               | 1.024                   | (0.997 - 1.051) |
| <b>Reason for assessment</b>                                                                                     |                         |                 |
| First assessment                                                                                                 | 1.000                   | (Reference)     |
| Routine reassessment                                                                                             | 0.941                   | (0.918 - 0.918) |
| Discharge assessment or discharge tracking                                                                       | 1.156                   | (0.736 - 1.816) |
| Significant change in status reassessment                                                                        | 1.240                   | (1.198 - 1.284) |
| Other (e.g. research)                                                                                            | 1.059                   | (0.889 - 1.261) |
| <b>Year of Assessment</b>                                                                                        |                         |                 |
| 2018                                                                                                             | 1.000                   | (Reference)     |
| 2019                                                                                                             | 0.992                   | (0.969 - 1.015) |
| <b>Receipt of life-sustaining treatments or therapies</b>                                                        |                         |                 |
| Cancer present and no chemotherapy                                                                               | 1.000                   | (Reference)     |
| Cancer present and chemotherapy ordered (implemented or not implemented)                                         | 1.616                   | (1.514 - 1.725) |
| No cancer and chemotherapy ordered (implemented or not implemented)                                              | 1.622                   | (1.243 - 2.117) |
| Chronic obstructive pulmonary disease (COPD) present and oxygen therapy ordered (implemented or not implemented) | 1.000                   | (Reference)     |
| COPD present and no oxygen therapy                                                                               | 0.627                   | (0.592 - 0.663) |
| No COPD and oxygen therapy ordered (implemented or not implemented)                                              | 1.824                   | (1.721 - 1.933) |

## II. Formula for deriving the RESPECT risk score (RESPECTScore)

Using the final model coefficients for the total cohort presented in the table above, the RESPECTScore can be calculated using the following formula:

$$\begin{aligned} \text{RESPECTScore} = & (\beta_{\text{Age\_RCS1}} * \text{Age\_RCS1}) + (\beta_{\text{Age\_RCS2}} * \text{Age\_RCS2}) + (\beta_{\text{Age\_RCS3}} * \text{Age\_RCS3}) + \\ & (\beta_{\text{Age\_RCS4}} * \text{Age\_RCS4}) + (\beta_{\text{Male}} * \text{Male}) + (\beta_{\text{Stroke}} * \text{Stroke}) + (\beta_{\text{CHF}} * \text{CHF}) + (\beta_{\text{CHD}} * \text{CHD}) + (\beta_{\text{Alzheimer/Dementia}} * \\ & \text{Alzheimer/Dementia}) + (\beta_{\text{MS}} * \text{MS}) + (\beta_{\text{ParkinsonsDisease}} * \text{ParkinsonsDisease}) + (\beta_{\text{IADL\_1}} * \text{IADL\_1}) + (\beta_{\text{IADL\_2}} * \\ & \text{IADL\_2}) + (\beta_{\text{IADL\_3}} * \text{IADL\_3}) + (\beta_{\text{IADL\_4}} * \text{IADL\_4}) + (\beta_{\text{IADL\_5}} * \text{IADL\_5}) + (\beta_{\text{IADL\_6}} * \text{IADL\_6}) + (\beta_{\text{ADL\_1}} * \\ & \text{ADL\_1}) + (\beta_{\text{ADL\_2}} * \text{ADL\_2}) + (\beta_{\text{ADL\_3}} * \text{ADL\_3}) + (\beta_{\text{ADL\_4}} * \text{ADL\_4}) + (\beta_{\text{ADL\_5}} * \text{ADL\_5}) + (\beta_{\text{ADL\_6}} * \text{ADL\_6}) + \\ & (\beta_{\text{Worsening\_ADL}} * \text{Worsening\_ADL}) + (\beta_{\text{Worsening\_Cognition}} * \text{Worsening\_Cognition}) + (\beta_{\text{Symptoms\_Vomiting}} * \\ & \text{Symptoms\_Vomiting}) + (\beta_{\text{Symptoms\_Edema}} * \text{Symptoms\_Edema}) + (\beta_{\text{Symptoms\_Dyspnea}} * \text{Symptoms\_Dyspnea}) + \\ & (\beta_{\text{Symptoms\_WeightLoss}} * \text{Symptoms\_WeightLoss}) + (\beta_{\text{Symptoms\_DecrsConsumption}} * \text{Symptoms\_DecrsConsumption}) + \\ & (\beta_{\text{Symptoms\_InsufficientFluid}} * \text{Symptoms\_InsufficientFluid}) + (\beta_{\text{TerminalIllness}} * \text{TerminalIllness}) + \\ & (\beta_{\text{COPD0\_OxygenTherapy1\_int}} * \text{COPD0\_OxygenTherapy1\_int}) + (\beta_{\text{COPD1\_OxygenTherapy0\_int}} * \\ & \text{COPD1\_OxygenTherapy0\_int}) + (\beta_{\text{Cancer1\_Chemo1\_int}} * \text{Cancer1\_Chemo1\_int}) + (\beta_{\text{Cancer0\_Chemo1\_int}} * \\ & \text{Cancer0\_Chemo1\_int}) + (\beta_{\text{Hospitalization1}} * \text{Hospitalization1}) + (\beta_{\text{Hospitalization2}} * \text{Hospitalization2}) + (\beta_{\text{Hospitalization3}} * \\ & \text{Hospitalization3}) + (\beta_{\text{ED1}} * \text{ED1}) + (\beta_{\text{ED2}} * \text{ED2}) + (\beta_{\text{ED3}} * \text{ED3}) + (\beta_{\text{AssessmentTyp\_Other}} * \\ & \text{AssessmentTyp\_Other}) + (\beta_{\text{AssessmentTyp\_Routine}} * \text{AssessmentTyp\_Routine}) + (\beta_{\text{AssessmentTyp\_DischargeAss}} * \\ & \text{AssessmentTyp\_DischargeAss}) + (\beta_{\text{AssessmentTyp\_HealthChange}} * \text{AssessmentTyp\_HealthChange}) + \\ & (\beta_{\text{AssessmentYear\_2019}} * \text{AssessmentYear\_2019}) \end{aligned}$$

For the restricted cubic spline (RCS) function with  $j = 1, \dots, k$  knots, its components can be derived using:  
 $\text{Age\_RCS1} = X$  (the centred value for age)

and

$$\begin{aligned} \text{Age\_RCS}_{j+1} = & \left( \frac{X - \text{knot}_j}{(\text{knot}_k - \text{knot}_1)^{2/3}} \right)_+^3 + (\text{knot}_{k-1} - \text{knot}_j) \left( \frac{X - \text{knot}_k}{(\text{knot}_k - \text{knot}_1)^{2/3}} \right)_+^3 \\ & - (\text{knot}_k - \text{knot}_j) \left( \frac{X - \text{knot}_{k-1}}{(\text{knot}_k - \text{knot}_1)^{2/3}} \right)_+^3 / (\text{knot}_k - \text{knot}_{k-1}) \end{aligned}$$

**Reference:** Harrell FE. Biostatistical Modeling.

<http://biostat.mc.vanderbilt.edu/wiki/pub/Main/BioMod/notes.pdf>. Published June 1, 2004. Accessed July 25, 2020.

### III. RESPECT risk bins

Using RESPECTScore, patients are placed into 1 of 61 risk bins. These bins were created to reflect incremental increases in estimated survival. Thresholds ranged from 0.2 percentile in the highest risk bins (bins 1-5) up to 3.0 percent in low risk bins (29-42).

| Risk Bin | Minimum RESPECTScore | Maximum RESPECTScore | Percentile Rank in Mortality Risk |
|----------|----------------------|----------------------|-----------------------------------|
| 1        | 3.52                 | -                    | 0.2                               |
| 2        | 3.19                 | 3.52                 | 0.2                               |
| 3        | 2.96                 | 3.19                 | 0.2                               |
| 4        | 2.80                 | 2.96                 | 0.2                               |
| 5        | 2.66                 | 2.80                 | 0.2                               |
| 6        | 2.39                 | 2.66                 | 0.5                               |
| 7        | 2.20                 | 2.39                 | 0.5                               |
| 8        | 2.06                 | 2.20                 | 0.5                               |
| 9        | 1.94                 | 2.06                 | 0.5                               |
| 10       | 1.76                 | 1.94                 | 1.0                               |
| 11       | 1.61                 | 1.76                 | 1.0                               |
| 12       | 1.49                 | 1.61                 | 1.0                               |
| 13       | 1.39                 | 1.49                 | 1.0                               |
| 14       | 1.30                 | 1.39                 | 1.0                               |
| 15       | 1.22                 | 1.30                 | 1.0                               |
| 16       | 1.15                 | 1.22                 | 1.0                               |
| 17       | 1.03                 | 1.15                 | 2.0                               |
| 18       | .92                  | 1.03                 | 2.1                               |
| 19       | .83                  | .92                  | 1.9                               |
| 20       | .75                  | .83                  | 1.9                               |
| 21       | .67                  | .75                  | 2.1                               |
| 22       | .58                  | .67                  | 2.6                               |
| 23       | .50                  | .58                  | 2.5                               |
| 24       | .43                  | .50                  | 2.4                               |
| 25       | .36                  | .43                  | 2.6                               |
| 26       | .30                  | .36                  | 2.3                               |
| 27       | .24                  | .30                  | 2.4                               |
| 28       | .18                  | .24                  | 2.5                               |
| 29       | .12                  | .18                  | 2.7                               |
| 30       | .06                  | .12                  | 2.7                               |
| 31       | .01                  | .06                  | 2.4                               |
| 32       | -.04                 | .01                  | 2.4                               |
| 33       | -.09                 | -.04                 | 2.4                               |
| 34       | -.14                 | -.09                 | 2.4                               |
| 35       | -.20                 | -.14                 | 3.0                               |

Appendix 1, as supplied by the authors. Appendix to: Murmann M, Manuel DG, Tanuseputro P, et al. Estimated mortality risk and use of palliative care services among home care clients during the last 6 months of life: a retrospective cohort study. *CMAJ* 2024. doi: 10.1503/cmaj.221513. Copyright © 2024 The Author(s) or their employer(s). To receive this resource in an accessible format, please contact us at [cmajgroup@cmaj.ca](mailto:cmajgroup@cmaj.ca).

| <b>Risk Bin</b> | <b>Minimum RESPECTScore</b> | <b>Maximum RESPECTScore</b> | <b>Percentile Rank in Mortality Risk</b> |
|-----------------|-----------------------------|-----------------------------|------------------------------------------|
| 36              | -.24                        | -.20                        | 2.0                                      |
| 37              | -.29                        | -.24                        | 2.5                                      |
| 38              | -.34                        | -.29                        | 2.6                                      |
| 39              | -.39                        | -.34                        | 2.5                                      |
| 40              | -.44                        | -.39                        | 2.5                                      |
| 41              | -.49                        | -.44                        | 2.4                                      |
| 42              | -.54                        | -.49                        | 2.4                                      |
| 43              | -.60                        | -.54                        | 2.8                                      |
| 44              | -.65                        | -.60                        | 2.2                                      |
| 45              | -.71                        | -.65                        | 2.6                                      |
| 46              | -.76                        | -.71                        | 2.1                                      |
| 47              | -.81                        | -.76                        | 2.0                                      |
| 48              | -.86                        | -.81                        | 1.8                                      |
| 49              | -.92                        | -.86                        | 2.0                                      |
| 50              | -.99                        | -.92                        | 2.2                                      |
| 51              | -1.02                       | -.99                        | 0.8                                      |
| 52              | -1.06                       | -1.02                       | 1.0                                      |
| 53              | -1.10                       | -1.06                       | 1.0                                      |
| 54              | -1.14                       | -1.10                       | 0.9                                      |
| 55              | -1.19                       | -1.14                       | 1.0                                      |
| 56              | -1.25                       | -1.19                       | 1.1                                      |
| 57              | -1.32                       | -1.25                       | 1.0                                      |
| 58              | -1.36                       | -1.32                       | 0.5                                      |
| 59              | -1.41                       | -1.36                       | 0.5                                      |
| 60              | -1.53                       | -1.41                       | 0.9                                      |
| 61              | -                           | -1.53                       | 1.0                                      |

eFigure 1. Cohort creation

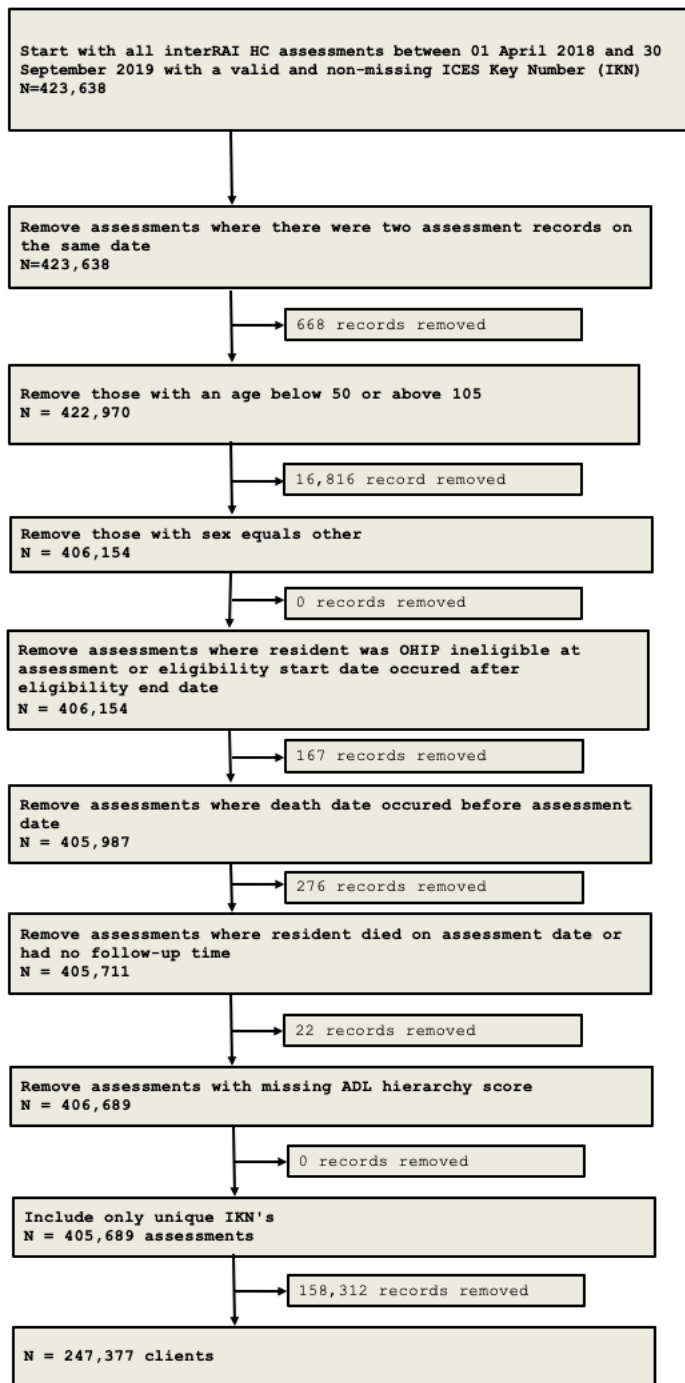

eTable 2. Predicted 6-month mortality risk and median survival across RESPECT risk bins

| Risk Bin | N    | Predicted Mortality Risk (%) | CI                | Median Survival (days) |
|----------|------|------------------------------|-------------------|------------------------|
| 1        | 499  | 98.07%                       | (97.937 - 98.207) | 30                     |
| 2        | 498  | 91.61%                       | (91.441 - 91.779) | 46                     |
| 3        | 513  | 84.77%                       | (84.616 - 84.930) | 65                     |
| 4        | 472  | 79.22%                       | (79.078 - 79.357) | 79                     |
| 5        | 513  | 73.94%                       | (73.821 - 74.056) | 82                     |
| 6        | 1239 | 66.42%                       | (66.261 - 66.583) | 114                    |
| 7        | 1265 | 58.17%                       | (58.058 - 58.280) | 146                    |
| 8        | 1196 | 52.28%                       | (52.196 - 52.363) | 172                    |
| 9        | 1294 | 47.76%                       | (47.699 - 47.826) | 204                    |
| 10       | 2437 | 42.73%                       | (42.663 - 42.798) | 241                    |
| 11       | 2589 | 37.78%                       | (37.736 - 37.833) | 292                    |
| 12       | 2535 | 34.04%                       | (34.007 - 34.082) | 329                    |
| 13       | 2429 | 31.11%                       | (31.081 - 31.142) | 378                    |
| 14       | 2386 | 28.71%                       | (28.680 - 28.731) | 431                    |
| 15       | 2515 | 26.68%                       | (26.659 - 26.700) | 465                    |
| 16       | 2487 | 25.02%                       | (25.003 - 25.037) | 517                    |
| 17       | 4862 | 23.02%                       | (22.998 - 23.038) | 563                    |
| 18       | 5270 | 20.81%                       | (20.790 - 20.821) | 652                    |
| 19       | 4789 | 19.07%                       | (19.053 - 19.079) | 666                    |
| 20       | 4796 | 17.62%                       | (17.611 - 17.632) | 734                    |
| 21       | 5281 | 16.40%                       | (16.389 - 16.407) | 783                    |
| 22       | 6517 | 15.23%                       | (15.222 - 15.240) | 821                    |
| 23       | 6209 | 14.11%                       | (14.104 - 14.119) | 889                    |
| 24       | 5971 | 13.13%                       | (13.121 - 13.134) | 933                    |
| 25       | 6367 | 12.29%                       | (12.289 - 12.300) | 981                    |
| 26       | 5677 | 11.54%                       | (11.540 - 11.550) | 1,020                  |
| 27       | 6040 | 10.88%                       | (10.875 - 10.884) | 1,100                  |
| 28       | 6288 | 10.27%                       | (10.268 - 10.276) | 1,106                  |
| 29       | 6603 | 9.73%                        | (9.723 - 9.730)   | 1,150                  |
| 30       | 6689 | 9.23%                        | (9.223 - 9.230)   | 1,188                  |
| 31       | 5866 | 8.76%                        | (8.752 - 8.758)   | 1,237                  |
| 32       | 5868 | 8.33%                        | (8.323 - 8.329)   | 1,265                  |
| 33       | 5945 | 7.92%                        | (7.913 - 7.919)   | 1,263                  |
| 34       | 6022 | 7.54%                        | (7.533 - 7.538)   | 1,315                  |
| 35       | 7394 | 7.17%                        | (7.170 - 7.175)   | 1,325                  |
| 36       | 5045 | 6.84%                        | (6.836 - 6.841)   | 1,351                  |
| 37       | 6206 | 6.52%                        | (6.516 - 6.520)   | 1,388                  |
| 38       | 6481 | 6.22%                        | (6.219 - 6.223)   | 1,399                  |
| 39       | 6269 | 5.93%                        | (5.931 - 5.935)   | 1,422                  |
| 40       | 6209 | 5.65%                        | (5.653 - 5.657)   | 1,451                  |

Appendix 1, as supplied by the authors. Appendix to: Murmann M, Manuel DG, Tanuseputro P, et al. Estimated mortality risk and use of palliative care services among home care clients during the last 6 months of life: a retrospective cohort study. *CMAJ* 2024. doi: 10.1503/cmaj.221513. Copyright © 2024 The Author(s) or their employer(s). To receive this resource in an accessible format, please contact us at [cmajgroup@cmaj.ca](mailto:cmajgroup@cmaj.ca).



| Risk Bin | N    | Predicted Mortality Risk (%) | CI              | Median Survival (days)    |
|----------|------|------------------------------|-----------------|---------------------------|
| 41       | 6034 | 5.39%                        | (5.385 - 5.389) | 1,455                     |
| 42       | 5927 | 5.12%                        | (5.120 - 5.123) | 1,462                     |
| 43       | 6923 | 4.87%                        | (4.865 - 4.869) | 1,492                     |
| 44       | 5489 | 4.61%                        | (4.610 - 4.614) | 1,496                     |
| 45       | 6439 | 4.37%                        | (4.363 - 4.367) | 1,525                     |
| 46       | 5181 | 4.15%                        | (4.144 - 4.147) | 1,506                     |
| 47       | 4831 | 3.95%                        | (3.948 - 3.951) | 1,515                     |
| 48       | 4524 | 3.75%                        | (3.750 - 3.753) | 1,522                     |
| 49       | 4997 | 3.55%                        | (3.549 - 3.552) | 1,537                     |
| 50       | 5341 | 3.34%                        | (3.338 - 3.341) | 1,523                     |
| 51       | 2053 | 3.18%                        | (3.177 - 3.180) | 1,528                     |
| 52       | 2548 | 3.06%                        | (3.063 - 3.066) | 1,539                     |
| 53       | 2525 | 2.95%                        | (2.947 - 2.949) | 1,525                     |
| 54       | 2211 | 2.83%                        | (2.829 - 2.832) | 1,543                     |
| 55       | 2486 | 2.70%                        | (2.699 - 2.702) | 1,550                     |
| 56       | 2643 | 2.57%                        | (2.566 - 2.569) | 1,535                     |
| 57       | 2449 | 2.41%                        | (2.412 - 2.416) | 1,548                     |
| 58       | 1246 | 2.29%                        | (2.284 - 2.287) | >1,505 at 35th percentile |
| 59       | 1225 | 2.19%                        | (2.187 - 2.191) | >1,438 at 26th percentile |
| 60       | 2317 | 2.02%                        | (2.014 - 2.020) | 1,537                     |
| 61       | 2457 | 1.62%                        | (1.613 - 1.630) | 1,576                     |

*Note:* Because follow up is censored by the end of study (June 29, 2022), we were unable to capture median survival for RESPECT risk bins 58 and 59. We therefore present the latest data point available in the specific risk bin indicating the relevant percentile captured.

eFigure 2. Mean predicted 6-month mortality risk across risk groups

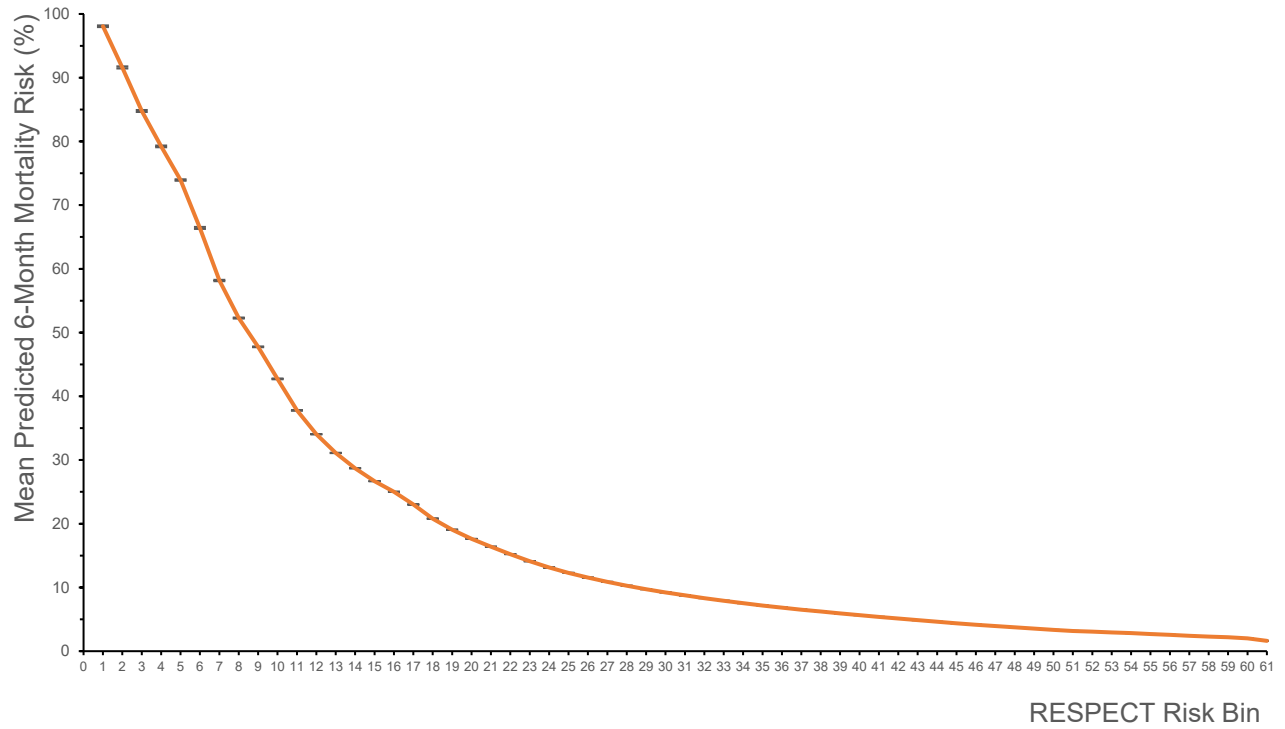

eFigure 3. Kaplan-Meier survival estimates of each mortality-risk profile

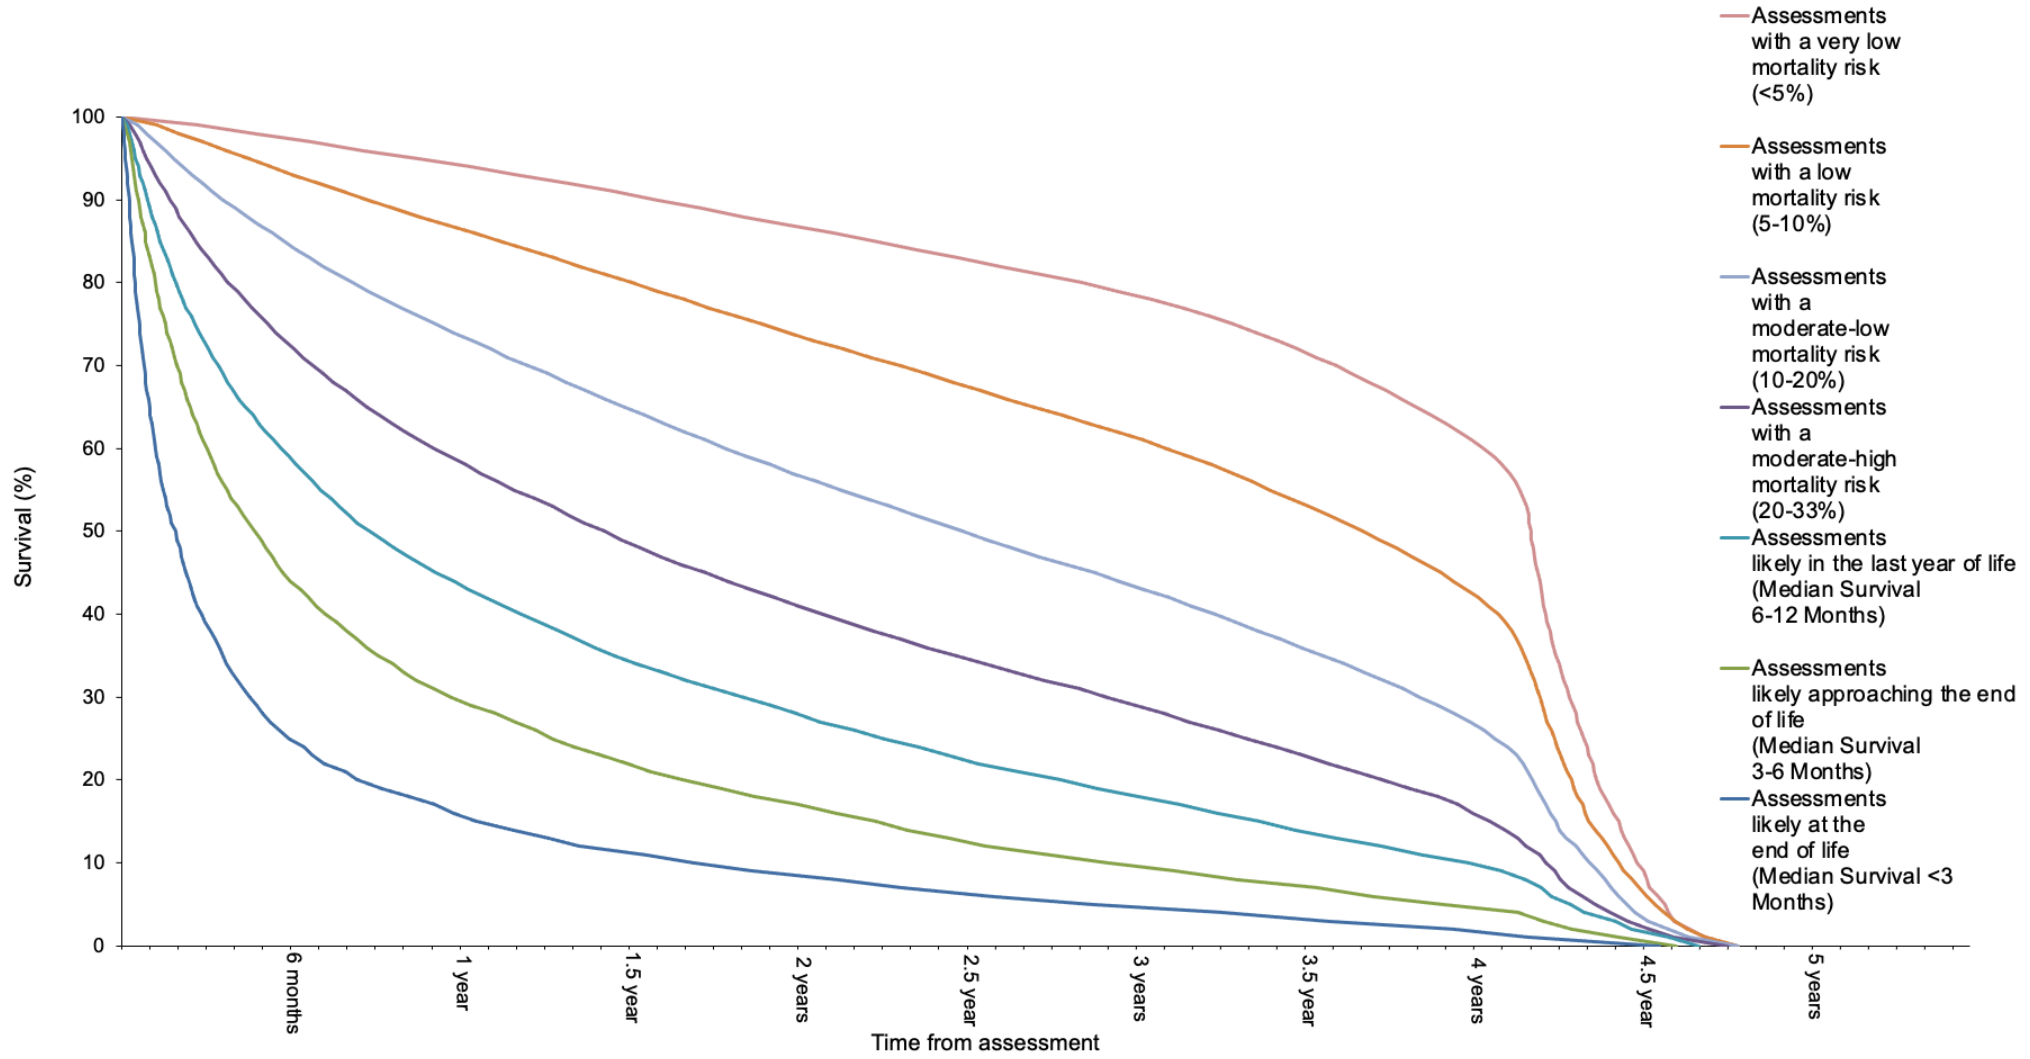

eTable 3. Cause of death across mortality-risk profiles among home care users who died within 6 months of an interRAI Home Care assessment

| Cause of Death                   | Mortality-Risk Profile, N (%)       |                                              |                                              |                                         |                                         |                                        |                                      |
|----------------------------------|-------------------------------------|----------------------------------------------|----------------------------------------------|-----------------------------------------|-----------------------------------------|----------------------------------------|--------------------------------------|
|                                  | Predicted median survival <3 months | Predicted median survival between 3-6 months | Predicted median survival between 6-12months | Predicted mortality risk between 20-33% | Predicted mortality risk between 10-20% | Predicted mortality risk between 5-10% | Predicted mortality risk between <5% |
| Frailty                          | 134 (12.04)                         | 141 (11.58)                                  | 309 (12.60)                                  | 484 (10.44)                             | 717 (7.01)                              | 330 (2.86)                             | 68 (1.10)                            |
| Organ failure                    | 365 (32.79)                         | 343 (28.16)                                  | 618 (25.19)                                  | 903 (19.48)                             | 1315 (12.86)                            | 797 (6.91)                             | 187 (3.04)                           |
| Sudden death                     | 21 (1.89)                           | 30 (2.46)                                    | 50 (2.04)                                    | 92 (1.98)                               | 155 (1.52)                              | 130 (1.13)                             | 32 (0.52)                            |
| Terminal illness                 | 398 (35.76)                         | 328 (26.93)                                  | 419 (17.08)                                  | 527 (11.37)                             | 585 (5.72)                              | 303 (2.63)                             | 42 (0.68)                            |
| Other                            | 33 (2.96)                           | 43 (3.53)                                    | 75 (3.06)                                    | 134 (2.89)                              | 157 (1.53)                              | 92 (0.80)                              | 22 (0.36)                            |
| No valid cause of death in ORGD  | 27 (2.43)                           | 26 (2.13)                                    | 36 (1.47)                                    | 38 (0.82)                               | 67 (0.66)                               | 29 (0.25)                              | 10 (0.16)                            |
| Did not die during 6m follow-up* | 135 (12.13)                         | 307 (25.21)                                  | 946 (38.57)                                  | 2457 (53.01)                            | 7233 (70.71)                            | 9847 (85.42)                           | 5797 (94.14)                         |

\*Cause of death data extracted from the Ontario Registrar General – Deaths database (ORGD) was only available until December 2018 at the time of this analysis and does not include the full study cohort.

eTable 4. Proportion of decedents who had at least one healthcare service day and intensity of service use

|                                             | Mortality-Risk Profiles                                                               |                                                                                                 |                                                                                               |                                                                    |                                                                   |                                                         |                                                            |
|---------------------------------------------|---------------------------------------------------------------------------------------|-------------------------------------------------------------------------------------------------|-----------------------------------------------------------------------------------------------|--------------------------------------------------------------------|-------------------------------------------------------------------|---------------------------------------------------------|------------------------------------------------------------|
|                                             | Assessments likely at the end of life (Predicted median Survival <3 Months) (n=1,870) | Assessments likely approaching the end of life (Predicted median Survival 3-6 Months) (n=2,051) | Assessments likely in the last year of life (Predicted median Survival 6-12 Months) (n=3,602) | Assessments with a moderate-high mortality risk (20-33%) (n=5,473) | Assessments with a moderate-low mortality risk (10-20%) (n=8,821) | Assessments with a low mortality risk (5-10%) (n=5,881) | Assessments with a very low mortality risk (<5%) (n=1,722) |
| <b>Non-Physician Palliative Home Care</b>   |                                                                                       |                                                                                                 |                                                                                               |                                                                    |                                                                   |                                                         |                                                            |
| Proportion*                                 | 50.59                                                                                 | 38.71                                                                                           | 29.48                                                                                         | 22.2                                                               | 18.58                                                             | 13.77                                                   | 9.93                                                       |
| Mean number of visits                       | 50.16                                                                                 | 53.49                                                                                           | 48.63                                                                                         | 48.37                                                              | 43.16                                                             | 39.19                                                   | 37.28                                                      |
| 5th percentile                              | 2                                                                                     | 2                                                                                               | 1                                                                                             | 1                                                                  | 1                                                                 | 1                                                       | 1                                                          |
| Lower quartile                              | 10                                                                                    | 13                                                                                              | 10                                                                                            | 9                                                                  | 8                                                                 | 6                                                       | 4                                                          |
| Median number of visits                     | 29.0                                                                                  | 33.0                                                                                            | 27.0                                                                                          | 27.0                                                               | 24.0                                                              | 21.5                                                    | 19.0                                                       |
| Upper quartile                              | 71                                                                                    | 79                                                                                              | 67                                                                                            | 69                                                                 | 57                                                                | 51                                                      | 56                                                         |
| 95th percentile                             | 180                                                                                   | 180                                                                                             | 180                                                                                           | 180                                                                | 180                                                               | 154                                                     | 143                                                        |
| <b>Physician Palliative Home Care Visit</b> |                                                                                       |                                                                                                 |                                                                                               |                                                                    |                                                                   |                                                         |                                                            |
| Proportion*                                 | 27.81                                                                                 | 28.33                                                                                           | 26.12                                                                                         | 26.04                                                              | 23.53                                                             | 19.37                                                   | 13.53                                                      |
| Mean number of visits                       | 1.98                                                                                  | 2.14                                                                                            | 2.07                                                                                          | 2.11                                                               | 1.94                                                              | 2.02                                                    | 2.06                                                       |
| 5th percentile                              | 1                                                                                     | 1                                                                                               | 1                                                                                             | 1                                                                  | 1                                                                 | 1                                                       | 1                                                          |
| Lower quartile                              | 1                                                                                     | 1                                                                                               | 1                                                                                             | 1                                                                  | 1                                                                 | 1                                                       | 1                                                          |
| Median number of visits                     | 1                                                                                     | 1                                                                                               | 1                                                                                             | 1                                                                  | 1                                                                 | 1                                                       | 1                                                          |
| Upper quartile                              | 2                                                                                     | 2                                                                                               | 2                                                                                             | 2                                                                  | 2                                                                 | 2                                                       | 2                                                          |
| 95th percentile                             | 6                                                                                     | 7                                                                                               | 6                                                                                             | 7                                                                  | 5                                                                 | 6                                                       | 5                                                          |
| <b>Emergency Department Visits</b>          |                                                                                       |                                                                                                 |                                                                                               |                                                                    |                                                                   |                                                         |                                                            |
| Proportion*                                 | 41.28                                                                                 | 55.24                                                                                           | 63.38                                                                                         | 71.88                                                              | 79.61                                                             | 83.66                                                   | 82                                                         |
| Mean number of days <sup>§</sup>            | 1.64                                                                                  | 1.74                                                                                            | 1.78                                                                                          | 1.84                                                               | 1.89                                                              | 1.91                                                    | 1.95                                                       |
| 5th percentile                              | 1                                                                                     | 1                                                                                               | 1                                                                                             | 1                                                                  | 1                                                                 | 1                                                       | 1                                                          |
| Lower quartile                              | 1                                                                                     | 1                                                                                               | 1                                                                                             | 1                                                                  | 1                                                                 | 1                                                       | 1                                                          |
| Median number of days <sup>§</sup>          | 1                                                                                     | 1                                                                                               | 1                                                                                             | 1                                                                  | 1                                                                 | 1                                                       | 1                                                          |
| Upper quartile                              | 2                                                                                     | 2                                                                                               | 2                                                                                             | 2                                                                  | 2                                                                 | 2                                                       | 2                                                          |
| 95th percentile                             | 4                                                                                     | 4                                                                                               | 4                                                                                             | 4                                                                  | 4                                                                 | 4                                                       | 5                                                          |

Appendix 1, as supplied by the authors. Appendix to: Murmann M, Manuel DG, Tanuseputro P, et al. Estimated mortality risk and use of palliative care services among home care clients during the last 6 months of life: a retrospective cohort study. *CMAJ* 2024. doi: 10.1503/cmaj.221513. Copyright © 2024 The Author(s) or their employer(s). To receive this resource in an accessible format, please contact us at cmajgroup@cmaj.ca.

|                                    | Assessments likely at the end of life (Predicted median Survival <3 Months) (n=1,870) | Assessments likely approaching the end of life (Predicted median Survival 3-6 Months) (n=2,051) | Assessments likely in the last year of life (Predicted median Survival 6-12 Months) (n=3,602) | Assessments with a moderate-high mortality risk (20-33%) (n=5,473) | Assessments with a moderate-low mortality risk (10-20%) (n=8,821) | Assessments with a low mortality risk (5-10%) (n=5,881) | Assessments with a very low mortality risk (<5%) (n=1,722) |
|------------------------------------|---------------------------------------------------------------------------------------|-------------------------------------------------------------------------------------------------|-----------------------------------------------------------------------------------------------|--------------------------------------------------------------------|-------------------------------------------------------------------|---------------------------------------------------------|------------------------------------------------------------|
| <b>Acute Care Hospitalizations</b> |                                                                                       |                                                                                                 |                                                                                               |                                                                    |                                                                   |                                                         |                                                            |
| Proportion*                        | 37.43                                                                                 | 49.15                                                                                           | 57.27                                                                                         | 65.38                                                              | 72.52                                                             | 76.35                                                   | 74.8                                                       |
| Mean number of days                | 13.63                                                                                 | 15.73                                                                                           | 16.08                                                                                         | 17.51                                                              | 17.72                                                             | 18.54                                                   | 17.29                                                      |
| 5th percentile                     | 1                                                                                     | 1                                                                                               | 1                                                                                             | 1                                                                  | 1                                                                 | 1                                                       | 1                                                          |
| Lower quartile                     | 4                                                                                     | 4                                                                                               | 4                                                                                             | 5                                                                  | 5                                                                 | 5                                                       | 5                                                          |
| Median number of days              | 8                                                                                     | 9                                                                                               | 10                                                                                            | 11                                                                 | 12                                                                | 12                                                      | 11                                                         |
| Upper quartile                     | 18                                                                                    | 21                                                                                              | 20                                                                                            | 23                                                                 | 23                                                                | 24                                                      | 23                                                         |
| 95th percentile                    | 41                                                                                    | 50                                                                                              | 53                                                                                            | 54                                                                 | 55                                                                | 59                                                      | 55                                                         |
| <b>Long-Term Care Admissions</b>   |                                                                                       |                                                                                                 |                                                                                               |                                                                    |                                                                   |                                                         |                                                            |
| Proportion*                        | 12.89                                                                                 | 15.94                                                                                           | 16.32                                                                                         | 17.49                                                              | 15.21                                                             | 12.8                                                    | 8.19                                                       |
| Mean number of days                | 50.53                                                                                 | 57.15                                                                                           | 52.48                                                                                         | 56.80                                                              | 55.79                                                             | 56.52                                                   | 50.75                                                      |
| 5th percentile                     | 4.0                                                                                   | 5.0                                                                                             | 5.0                                                                                           | 5.0                                                                | 5.0                                                               | 5.0                                                     | 5.5                                                        |
| Lower quartile                     | 15.0                                                                                  | 23.0                                                                                            | 19.0                                                                                          | 21.5                                                               | 21.0                                                              | 20.0                                                    | 19.0                                                       |
| Median number of days              | 42.0                                                                                  | 46.0                                                                                            | 41.0                                                                                          | 47.0                                                               | 48.5                                                              | 47.0                                                    | 47.5                                                       |
| Upper quartile                     | 75.0                                                                                  | 84.0                                                                                            | 81.0                                                                                          | 88.0                                                               | 84.0                                                              | 86.0                                                    | 72.0                                                       |
| 95th percentile                    | 130.0                                                                                 | 142.0                                                                                           | 132.0                                                                                         | 142.0                                                              | 136.0                                                             | 135.0                                                   | 120.5                                                      |

\*Proportion of decedents with at least one healthcare service day

§Number of days with at least 1 emergency department visit

eTable 5. Proportion and number of non-physician palliative home care visits provided to decedents, sensitivity analysis excluding individuals with a sudden death

|                         | Mortality-Risk Profiles                                                             |                                                                                               |                                                                                               |                                                                    |                                                                   |                                                         |                                                          |
|-------------------------|-------------------------------------------------------------------------------------|-----------------------------------------------------------------------------------------------|-----------------------------------------------------------------------------------------------|--------------------------------------------------------------------|-------------------------------------------------------------------|---------------------------------------------------------|----------------------------------------------------------|
|                         | Assessments likely at the end of life (Predicted median Survival <3 Months) (n=957) | Assessments likely approaching the end of life (Predicted median Survival 3-6 Months) (n=881) | Assessments likely in the last year of life (Predicted median Survival 6-12 Months) (n=1,457) | Assessments with a moderate-high mortality risk (20-33%) (n=2,086) | Assessments with a moderate-low mortality risk (10-20%) (n=2,841) | Assessments with a low mortality risk (5-10%) (n=1,551) | Assessments with a very low mortality risk (<5%) (n=329) |
| Proportion*             | 50.16                                                                               | 36.44                                                                                         | 27.11                                                                                         | 20.81                                                              | 16.72                                                             | 11.61                                                   | 7.29                                                     |
| Mean number of visits   | 43.96                                                                               | 51.52                                                                                         | 45.23                                                                                         | 45.30                                                              | 39.80                                                             | 30.06                                                   | 32.58                                                    |
| 5th percentile          | 1                                                                                   | 1                                                                                             | 2                                                                                             | 1                                                                  | 1                                                                 | 1                                                       | 1                                                        |
| Lower quartile          | 9.0                                                                                 | 13.0                                                                                          | 10.0                                                                                          | 7.0                                                                | 8.0                                                               | 4.5                                                     | 4.0                                                      |
| Median number of visits | 25.5                                                                                | 31.0                                                                                          | 27.0                                                                                          | 25.0                                                               | 24.0                                                              | 18.0                                                    | 15.5                                                     |
| Upper quartile          | 59.0                                                                                | 71.0                                                                                          | 61.0                                                                                          | 62.0                                                               | 49.0                                                              | 42.5                                                    | 56.5                                                     |
| 95th percentile         | 176                                                                                 | 180                                                                                           | 180                                                                                           | 180                                                                | 167                                                               | 107                                                     | 113                                                      |

eTable 6. Baseline characteristics of decedents from the highest mortality-risk profiles, stratified by receipt of palliative home care visit provided by a physician or non-physician

|                                                     | Predicted median survival <3 months |                  | Predicted median survival between 3-6 months |                  | Predicted median survival between 6-12 months |                  |
|-----------------------------------------------------|-------------------------------------|------------------|----------------------------------------------|------------------|-----------------------------------------------|------------------|
|                                                     | Palliative Home Care Received       |                  | Palliative Home Care Received                |                  | Palliative Home Care Received                 |                  |
|                                                     | No<br>(n=1,091)                     | Yes<br>(n=1,404) | No<br>(n=2,061)                              | Yes<br>(n=1,639) | No<br>(n=5,859)                               | Yes<br>(n=2,996) |
| <b>Age</b>                                          |                                     |                  |                                              |                  |                                               |                  |
| 50-59                                               | *25-29                              | 29 (2.1%)        | 32 (1.6%)                                    | 54 (3.3%)        | 115 (2.0%)                                    | 91 (3.0%)        |
| 60-69                                               | 56 (5.1%)                           | 107 (7.6%)       | 153 (7.4%)                                   | 146 (8.9%)       | 387 (6.6%)                                    | 269 (9.0%)       |
| 70-79                                               | 181 (16.6%)                         | 268 (19.1%)      | 333 (16.2%)                                  | 333 (20.3%)      | 1,064 (18.2%)                                 | 555 (18.5%)      |
| 80-89                                               | 440 (40.3%)                         | 560 (39.9%)      | 806 (39.1%)                                  | 627 (38.3%)      | 2,278 (38.9%)                                 | 1,066 (35.6%)    |
| 90-99                                               | 368 (33.7%)                         | 408 (29.1%)      | 701 (34.0%)                                  | 449 (27.4%)      | 1,909 (32.6%)                                 | 952 (31.8%)      |
| 100+                                                | *17-21                              | 32 (2.3%)        | 36 (1.7%)                                    | 30 (1.8%)        | 106 (1.8%)                                    | 63 (2.1%)        |
| <b>Sex</b>                                          |                                     |                  |                                              |                  |                                               |                  |
| Female                                              | 390 (35.7%)                         | 569 (40.5%)      | 734 (35.6%)                                  | 709 (43.3%)      | 2,242 (38.3%)                                 | 1,353 (45.2%)    |
| Male                                                | 701 (64.3%)                         | 835 (59.5%)      | 1,327 (64.4%)                                | 930 (56.7%)      | 3,617 (61.7%)                                 | 1,643 (54.8%)    |
| <b>Diseases</b>                                     |                                     |                  |                                              |                  |                                               |                  |
| Stroke                                              | 172 (15.8%)                         | 182 (13.0%)      | 333 (16.2%)                                  | 211 (12.9%)      | 944 (16.1%)                                   | 401 (13.4%)      |
| Congestive heart failure                            | 478 (43.8%)                         | 516 (36.8%)      | 857 (41.6%)                                  | 552 (33.7%)      | 2,261 (38.6%)                                 | 901 (30.1%)      |
| Coronary heart disease                              | 481 (44.1%)                         | 535 (38.1%)      | 924 (44.8%)                                  | 639 (39.0%)      | 2,532 (43.2%)                                 | 1,108 (37.0%)    |
| Dementia (combined Alzheimer's and other dementias) | 354 (32.4%)                         | 373 (26.6%)      | 719 (34.9%)                                  | 435 (26.5%)      | 1,978 (33.8%)                                 | 846 (28.2%)      |
| Multiple sclerosis                                  | *1-5                                | *1-5             | 6 (0.3%)                                     | *1-5             | 15 (0.3%)                                     | 10 (0.3%)        |
| Parkinson's                                         | 29 (2.7%)                           | 37 (2.6%)        | 81 (3.9%)                                    | 60 (3.7%)        | 208 (3.6%)                                    | 110 (3.7%)       |
| Cancer                                              | 671 (61.5%)                         | 888 (63.2%)      | 1,140 (55.3%)                                | 948 (57.8%)      | 2,655 (45.3%)                                 | 1,525 (50.9%)    |
| Chronic obstructive pulmonary disease               | 362 (33.2%)                         | 371 (26.4%)      | 627 (30.4%)                                  | 468 (28.6%)      | 1,699 (29.0%)                                 | 749 (25.0%)      |
| <b>Signs and Symptoms of Health Instability</b>     |                                     |                  |                                              |                  |                                               |                  |

Appendix 1, as supplied by the authors. Appendix to: Murmann M, Manuel DG, Tanuseputro P, et al. Estimated mortality risk and use of palliative care services among home care clients during the last 6 months of life: a retrospective cohort study. *CMAJ* 2024. doi: 10.1503/cmaj.221513. Copyright © 2024 The Author(s) or their employer(s). To receive this resource in an accessible format, please contact us at cmajgroup@cmaj.ca.



|                                                                     |             |               |               |               |               |               |
|---------------------------------------------------------------------|-------------|---------------|---------------|---------------|---------------|---------------|
| Vomiting in at least 2 of the last 3 days                           | 45 (4.1%)   | 78 (5.6%)     | 55 (2.7%)     | 46 (2.8%)     | 86 (1.5%)     | 60 (2.0%)     |
| Edema in the last 3 days                                            | 471 (43.2%) | 627 (44.7%)   | 901 (43.7%)   | 671 (40.9%)   | 2,483 (42.4%) | 1,195 (39.9%) |
| Dyspnea (shortness of breath)                                       | 817 (74.9%) | 1,087 (77.4%) | 1,440 (69.9%) | 1,174 (71.6%) | 3,810 (65.0%) | 1,915 (63.9%) |
| Fluid intake less than four 8 oz cups per day                       | 422 (38.7%) | 588 (41.9%)   | 471 (22.9%)   | 343 (20.9%)   | 1,010 (17.2%) | 443 (14.8%)   |
| Weight loss of >5% in the last 30 days or >10% in the last 6 months | 695 (63.7%) | 881 (62.7%)   | 1,023 (49.6%) | 785 (47.9%)   | 2,269 (38.7%) | 1,089 (36.3%) |
| Decrease in amount food or fluid usually consumed                   | 695 (63.7%) | 926 (66.0%)   | 901 (43.7%)   | 709 (43.3%)   | 1,906 (32.5%) | 897 (29.9%)   |
| <b>Prognosis &lt;6 months to live</b>                               | 716 (65.6%) | 1,228 (87.5%) | 600 (29.1%)   | 953 (58.1%)   | 562 (9.6%)    | 847 (28.3%)   |
| <b>Pain Symptoms</b>                                                |             |               |               |               |               |               |
| Frequency with which patient complains or shows evidence of pain    |             |               |               |               |               |               |
| No pain                                                             | 315 (28.9%) | 359 (25.6%)   | 618 (30.0%)   | 481 (29.3%)   | 1,840 (31.4%) | 908 (30.3%)   |
| Present but not exhibited in last 3 days                            | 64 (5.9%)   | 68 (4.8%)     | 126 (6.1%)    | 81 (4.9%)     | 341 (5.8%)    | 167 (5.6%)    |
| Exhibited on 1-2 of last 3 days                                     | 125 (11.5%) | 149 (10.6%)   | 227 (11.0%)   | 195 (11.9%)   | 652 (11.1%)   | 325 (10.8%)   |
| Exhibited daily in last 3 days                                      | 587 (53.8%) | 828 (59.0%)   | 1,090 (52.9%) | 882 (53.8%)   | 3,026 (51.6%) | 1,596 (53.3%) |
| Intensity of highest level of pain present                          |             |               |               |               |               |               |
| No pain                                                             | 379 (34.7%) | 427 (30.4%)   | 744 (36.1%)   | 562 (34.3%)   | 2,181 (37.2%) | 1,075 (35.9%) |
| Mild                                                                | 89 (8.2%)   | 133 (9.5%)    | 198 (9.6%)    | 167 (10.2%)   | 592 (10.1%)   | 286 (9.5%)    |
| Moderate                                                            | 414 (37.9%) | 479 (34.1%)   | 763 (37.0%)   | 553 (33.7%)   | 2,072 (35.4%) | 1,028 (34.3%) |
| Severe                                                              | 159 (14.6%) | 255 (18.2%)   | 263 (12.8%)   | 269 (16.4%)   | 793 (13.5%)   | 471 (15.7%)   |
| Time when pain is horrible or excruciating                          | 50 (4.6%)   | 110 (7.8%)    | 93 (4.5%)     | 88 (5.4%)     | 221 (3.8%)    | 136 (4.5%)    |
| Consistency of pain                                                 |             |               |               |               |               |               |
| No pain                                                             | 379 (34.7%) | 427 (30.4%)   | 744 (36.1%)   | 562 (34.3%)   | 2,181 (37.2%) | 1,075 (35.9%) |
| Single episode during last 3 days                                   | 14 (1.3%)   | 10 (0.7%)     | 19 (0.9%)     | 19 (1.2%)     | 52 (0.9%)     | 22 (0.7%)     |
| Intermittent                                                        | 527 (48.3%) | 666 (47.4%)   | 960 (46.6%)   | 733 (44.7%)   | 2,632 (44.9%) | 1,362 (45.5%) |
| Constant                                                            | 171 (15.7%) | 301 (21.4%)   | 338 (16.4%)   | 325 (19.8%)   | 994 (17.0%)   | 537 (17.9%)   |

|                                                                                         |             |             |               |               |               |               |
|-----------------------------------------------------------------------------------------|-------------|-------------|---------------|---------------|---------------|---------------|
| Experiences breakthrough pain                                                           | 354 (32.4%) | 498 (35.5%) | 595 (28.9%)   | 499 (30.4%)   | 1,516 (25.9%) | 827 (27.6%)   |
| Pain control (adequacy or inadequacy of pain control measures)                          |             |             |               |               |               |               |
| No issue of pain                                                                        | 379 (34.7%) | 427 (30.4%) | 744 (36.1%)   | 562 (34.3%)   | 2,181 (37.2%) | 1,075 (35.9%) |
| Pain intensity acceptable to person, no treatment regimen or change in regimen required | 96 (8.8%)   | 159 (11.3%) | 221 (10.7%)   | 185 (11.3%)   | 618 (10.5%)   | 297 (9.9%)    |
| Controlled adequately by therapeutic regimen                                            | 346 (31.7%) | 427 (30.4%) | 632 (30.7%)   | 509 (31.1%)   | 1,782 (30.4%) | 925 (30.9%)   |
| Controlled when therapeutic regimen followed, but not always followed as ordered        | 64 (5.9%)   | 83 (5.9%)   | 115 (5.6%)    | 72 (4.4%)     | 270 (4.6%)    | 145 (4.8%)    |
| Therapeutic regimen followed, by pain control not adequate                              | 157 (14.4%) | 237 (16.9%) | 279 (13.5%)   | 254 (15.5%)   | 800 (13.7%)   | 424 (14.2%)   |
| No therapeutic regimen being followed for pain; pain not adequately controlled          | 49 (4.5%)   | 71 (5.1%)   | 70 (3.4%)     | 57 (3.5%)     | 208 (3.6%)    | 130 (4.3%)    |
| <b>Health Service Use</b>                                                               |             |             |               |               |               |               |
| Number of inpatient admissions over the past 90 days                                    |             |             |               |               |               |               |
| 0                                                                                       | 203 (18.6%) | 466 (33.2%) | 457 (22.2%)   | 613 (37.4%)   | 1,557 (26.6%) | 1,214 (40.5%) |
| 1                                                                                       | 622 (57.0%) | 625 (44.5%) | 1,142 (55.4%) | 769 (46.9%)   | 3,176 (54.2%) | 1,359 (45.4%) |
| 2                                                                                       | 177 (16.2%) | 219 (15.6%) | 327 (15.9%)   | 188 (11.5%)   | 794 (13.6%)   | 305 (10.2%)   |
| 3+                                                                                      | 89 (8.2%)   | 94 (6.7%)   | 135 (6.6%)    | 69 (4.2%)     | 332 (5.7%)    | 118 (3.9%)    |
| Number of emergency room visits over the past 90 days                                   |             |             |               |               |               |               |
| 0                                                                                       | 625 (57.3%) | 807 (57.5%) | 1,226 (59.5%) | 1,005 (61.3%) | 3,471 (59.2%) | 1,874 (62.6%) |
| 1                                                                                       | 279 (25.6%) | 356 (25.4%) | 480 (23.3%)   | 389 (23.7%)   | 1,455 (24.8%) | 685 (22.9%)   |
| 2                                                                                       | 108 (9.9%)  | 141 (10.0%) | 200 (9.7%)    | 141 (8.6%)    | 538 (9.2%)    | 268 (8.9%)    |
| 3+                                                                                      | 79 (7.2%)   | 100 (7.1%)  | 155 (7.5%)    | 104 (6.3%)    | 395 (6.7%)    | 169 (5.6%)    |
| Receipt of life-sustaining treatments or therapies                                      |             |             |               |               |               |               |
| Chemotherapy <sup>1</sup>                                                               | 89 (8.2%)   | 158 (11.3%) | 187 (9.1%)    | 137 (8.4%)    | 376 (6.4%)    | 278 (9.3%)    |

|                                                                                                                                                         |               |               |               |               |               |               |
|---------------------------------------------------------------------------------------------------------------------------------------------------------|---------------|---------------|---------------|---------------|---------------|---------------|
| Dialysis <sup>1</sup>                                                                                                                                   | 25 (2.3%)     | 16 (1.1%)     | 63 (3.1%)     | 20 (1.2%)     | 154 (2.6%)    | 41 (1.4%)     |
| Oxygen therapy, ventilator or respirator <sup>1</sup>                                                                                                   | 426 (39.0%)   | 486 (34.6%)   | 529 (25.7)    | 423 (25.8)    | 1124 (19.2%)  | 591 (19.7%)   |
| <b>Functional Capacity</b>                                                                                                                              |               |               |               |               |               |               |
| Instrumental Activities of Daily Living (IADL) Self Performance and Capacity Scale (in in performing ordinary housework, meal preparation or phone use) |               |               |               |               |               |               |
| 0 = Independent                                                                                                                                         | 0 (0.0%)      | *2-6          | *2-6          | 24 (0.4%)     | 19 (0.6%)     | 59 (0.4%)     |
| 1                                                                                                                                                       | 0 (0.0%)      | *1-5          | 0 (0.0%)      | 23 (0.4%)     | *8-12         | 83 (0.6%)     |
| 2                                                                                                                                                       | 7 (0.5%)      | 20 (1.0%)     | *30-34        | 83 (1.4%)     | 80 (2.7%)     | 434 (3.0%)    |
| 3                                                                                                                                                       | 17 (1.2%)     | 43 (2.1%)     | *18-22        | 111 (1.9%)    | 88 (2.9%)     | 457 (3.1%)    |
| 4                                                                                                                                                       | 41 (2.9%)     | 97 (4.7%)     | 87 (5.3%)     | 342 (5.8%)    | 186 (6.2%)    | 1,057 (7.2%)  |
| 5                                                                                                                                                       | 382 (27.2%)   | 564 (27.4%)   | 553 (33.7%)   | 1,849 (31.6%) | 1,050 (35.0%) | 4,931 (33.5%) |
| 6 = Total dependence                                                                                                                                    | 957 (68.2%)   | 1,330 (64.5%) | 944 (57.6%)   | 3,427 (58.5%) | 1,564 (52.2%) | 7,681 (52.2%) |
| Activities of Daily Living (ADL) Self Performance Hierarchy scale (maintaining personal hygiene, toilet use, locomotion, and eating)                    |               |               |               |               |               |               |
| 0 = Independent                                                                                                                                         | 39 (3.6%)     | 79 (5.6%)     | 154 (7.5%)    | 186 (11.3%)   | 572 (9.8%)    | 431 (14.4%)   |
| 1                                                                                                                                                       | 23 (2.1%)     | 39 (2.8%)     | 93 (4.5%)     | 107 (6.5%)    | 306 (5.2%)    | 180 (6.0%)    |
| 2                                                                                                                                                       | 62 (5.7%)     | 136 (9.7%)    | 218 (10.6%)   | 219 (13.4%)   | 747 (12.7%)   | 437 (14.6%)   |
| 3                                                                                                                                                       | 134 (12.3%)   | 198 (14.1%)   | 309 (15.0%)   | 296 (18.1%)   | 1,029 (17.6%) | 492 (16.4%)   |
| 4                                                                                                                                                       | 231 (21.2%)   | 303 (21.6%)   | 396 (19.2%)   | 281 (17.1%)   | 1,207 (20.6%) | 499 (16.7%)   |
| 5                                                                                                                                                       | 420 (38.5%)   | 434 (30.9%)   | 663 (32.2%)   | 382 (23.3%)   | 1,595 (27.2%) | 657 (21.9%)   |
| 6 = Total dependence                                                                                                                                    | 182 (16.7%)   | 215 (15.3%)   | 228 (11.1%)   | 168 (10.3%)   | 403 (6.9%)    | 300 (10.0%)   |
| Worsening ADL                                                                                                                                           | 1,057 (96.9%) | 1,340 (95.4%) | 1,898 (92.1%) | 1,466 (89.4%) | 5,272 (90.0%) | 2,536 (84.6%) |
| <b>Worsening decision-making capacity</b>                                                                                                               | 669 (61.3%)   | 776 (55.3%)   | 1,046 (50.8%) | 711 (43.4%)   | 2,769 (47.3%) | 1,226 (40.9%) |
| <sup>1</sup> Ordered (implemented or not implemented)                                                                                                   |               |               |               |               |               |               |

eFigure 4. Receipt and level of inpatient palliative care, stratified by mortality-risk profile

a) Level of hospital-based palliative care received among individuals who were hospitalized and died within 6 months of an interRAI Home Care assessment

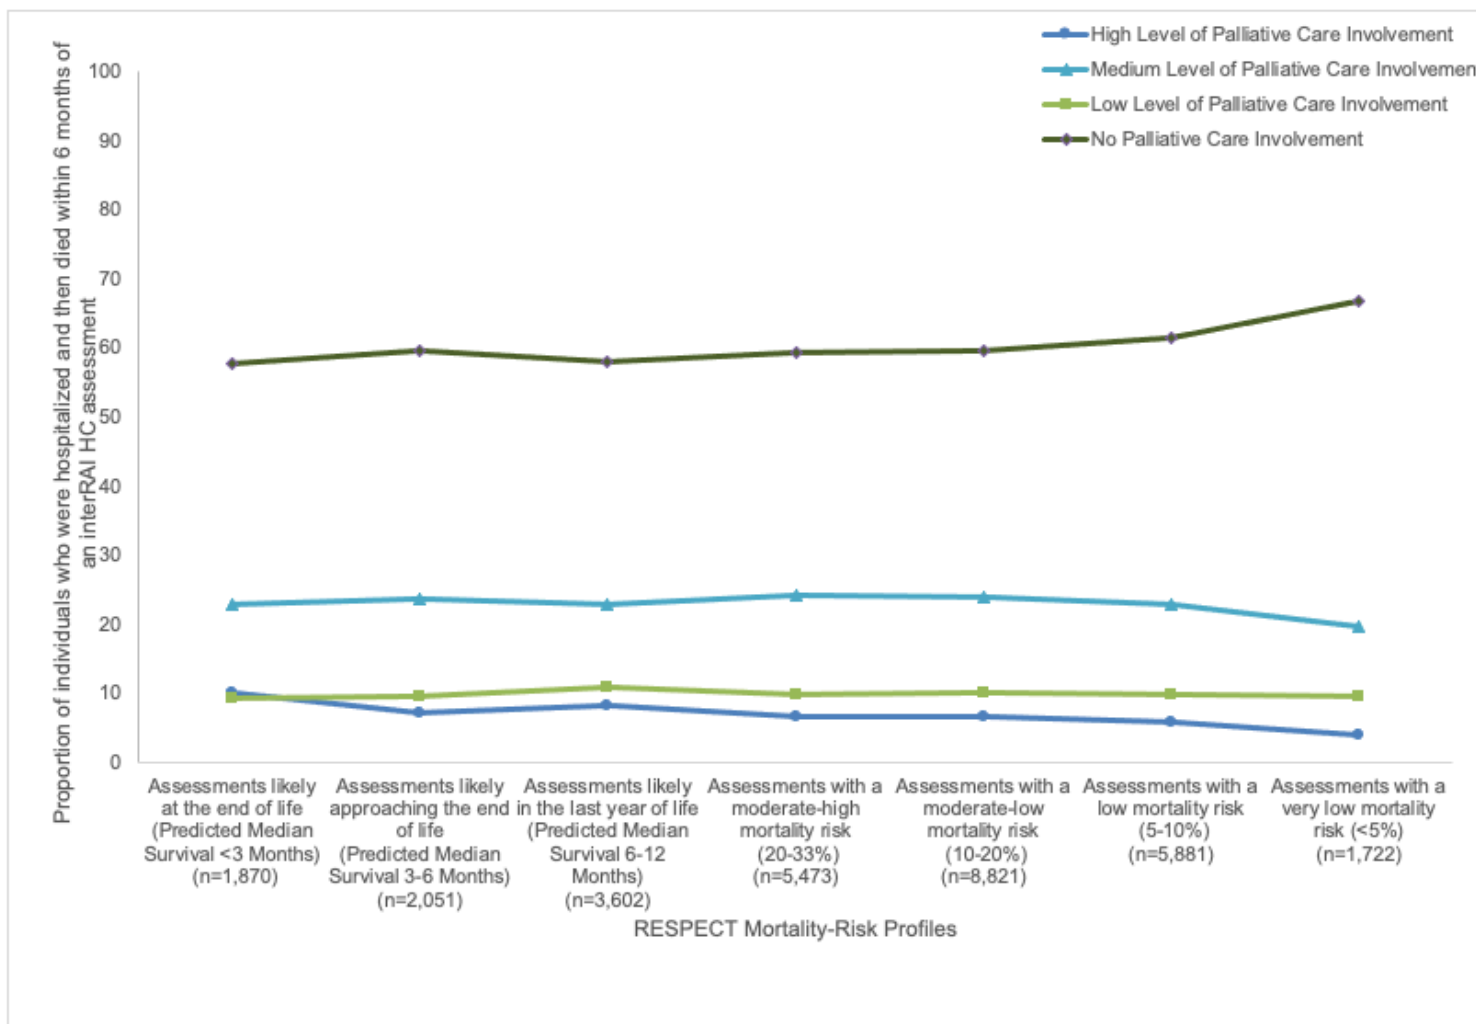

b) Level of hospital-based palliative care received among all clients hospitalized within 6 months of an interRAI Home Care assessment

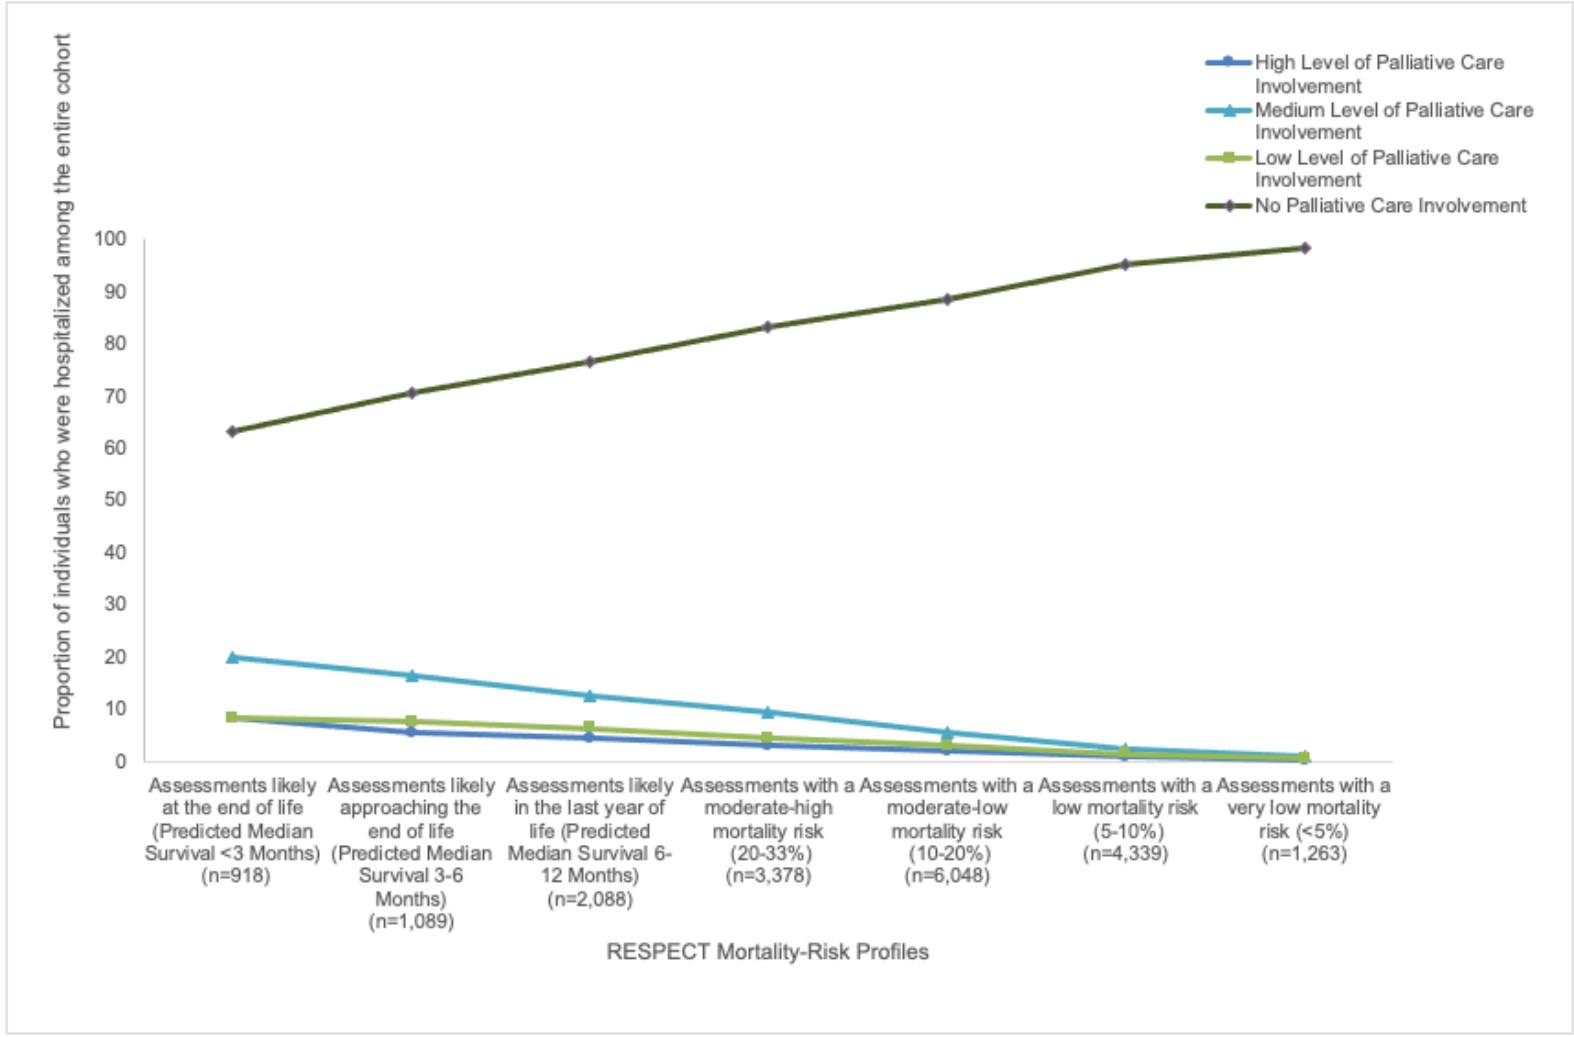

eFigure 5. Proportion of users (decedents and survivors) who had at least one healthcare service encounter and intensity of use

A) Non-Physician Palliative Care Home Visits

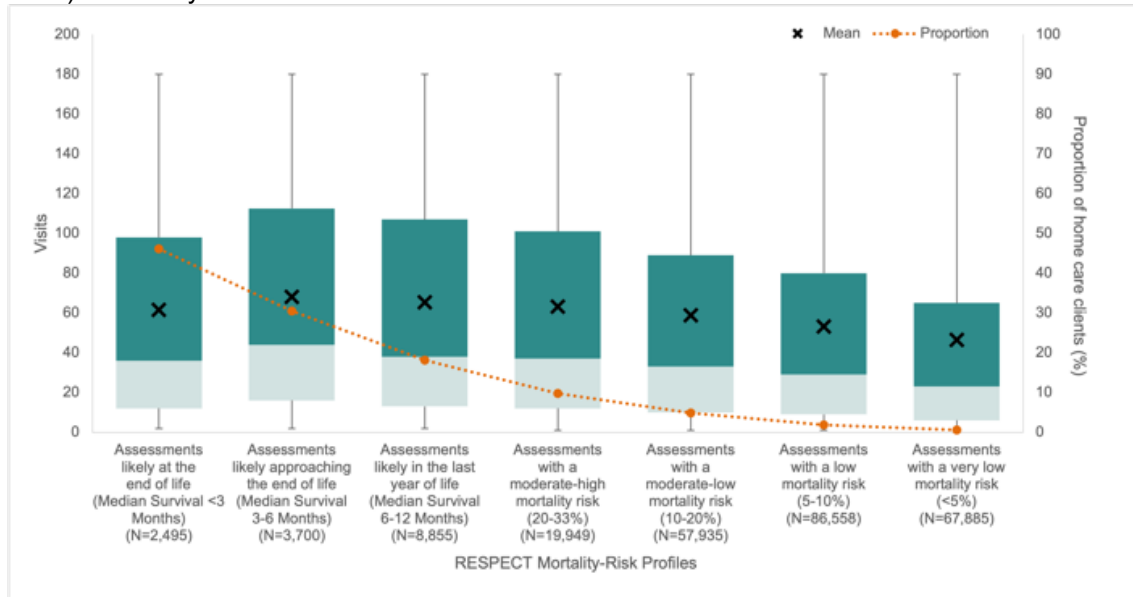

B) Physician Palliative Care Home Visits

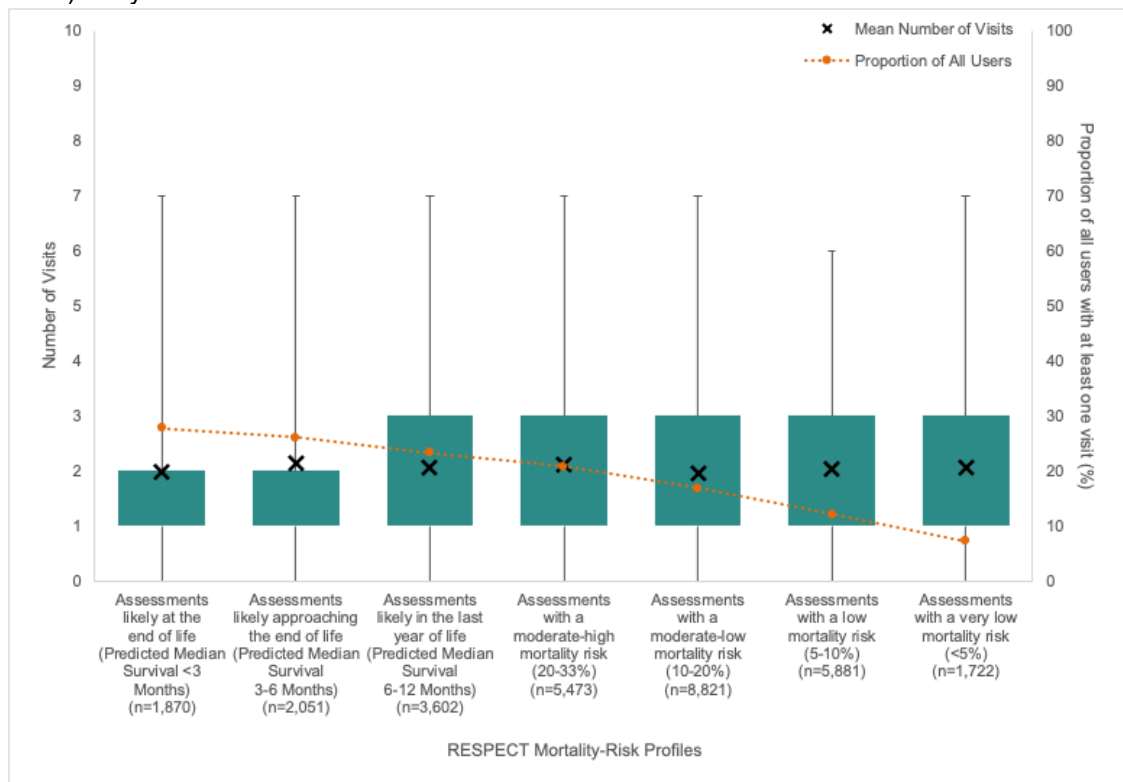

C) Emergency Department Visits

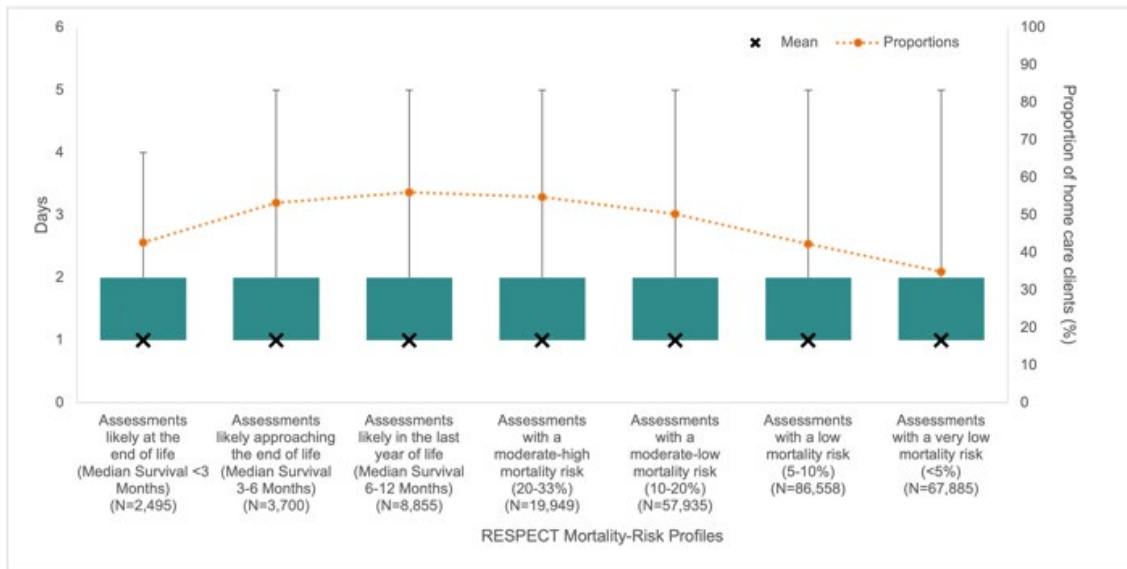

D) Acute Care Hospitalizations

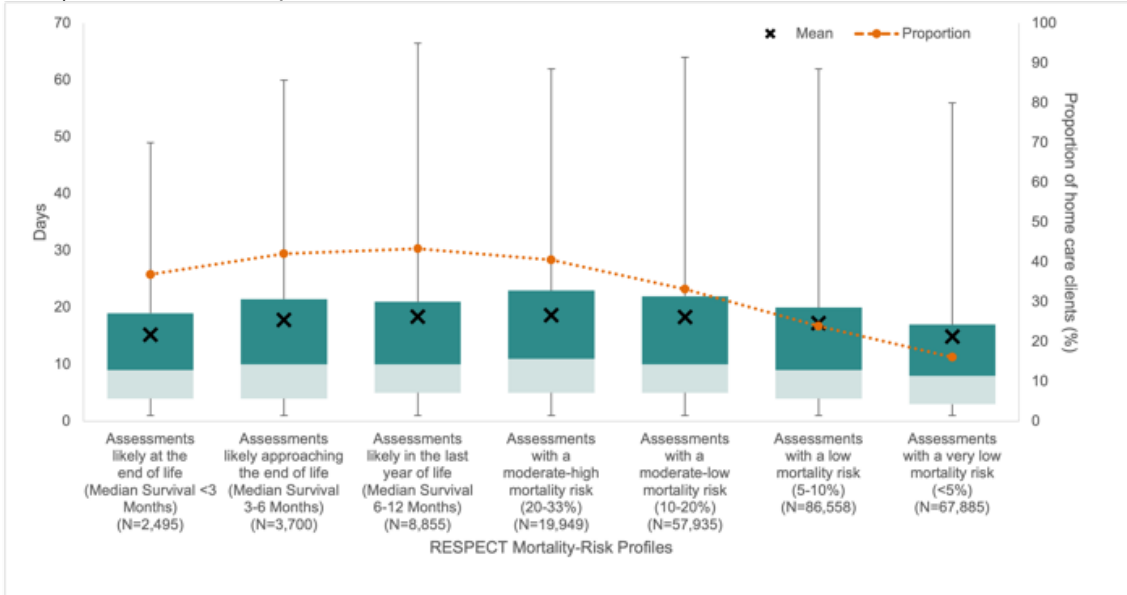

## E) Long-Term Care Home Admissions

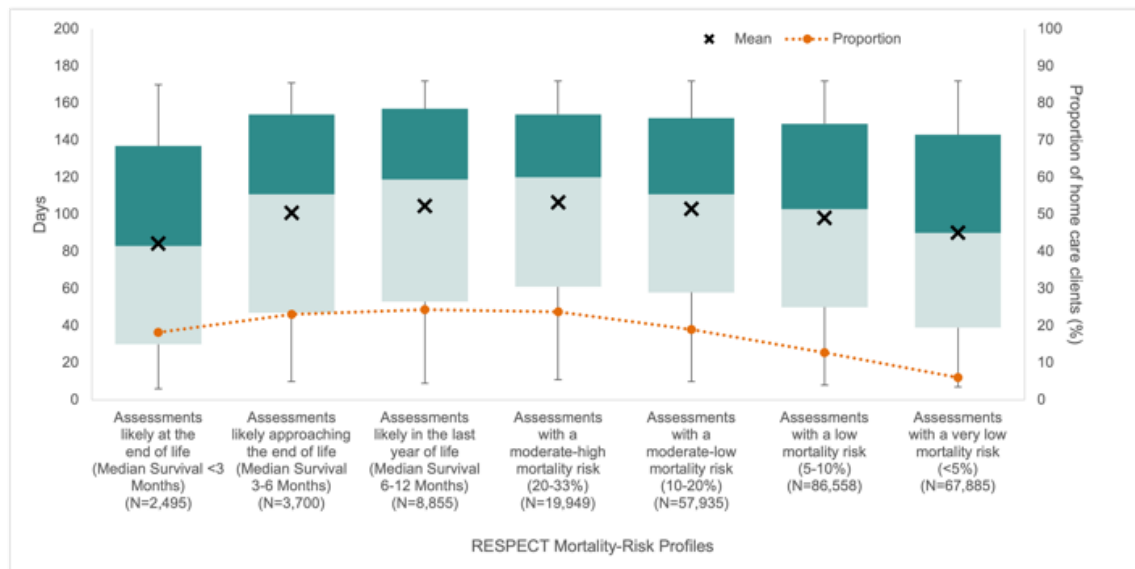

Within our study cohort, 75.0%, 55.4% and 40.3% of assessments with a predicted median survival of <3 months, between 3 and 6 months, and between 6 and 12 months, respectively, died within 6 months of an interRAI Home Care assessment (Table 1). Healthcare utilization patterns of decedents are described in the main text. Here, we describe the place and length of care across all assessments, including those who survived beyond 6 months post-assessment.

Inclusive of those who survived beyond 6 months of their interRAI Home Care assessment, less than half (46.1%), roughly one-third (30.5%), and nearly one-fifth (18.1%) of those with a predicted median survival of <3 months, between 3 and 6 months, and between 6 and 12 months, respectively, received at least one palliative home care visit provided by a non-physician (eFigure 5). The median number of non-physician palliative home care visits in the three highest risk profiles were 36 (IQR: 12-98), 44 (IQR: 16-113) and 38 (IQR: 13-107), respectively. As was observed among decedents, the proportion of all assessments that received at least one visit as well as the median number of visits received declined with decreasing mortality risk. Less than a third (27.8%), nearly a quarter (26.1%), and less than a quarter (23.3%) of those in the highest three mortality risk profiles received at least one palliative home care visit provided by a physician.

Unlike what was observed among decedents, the proportion of assessments with at least one day of institutional care follows an inverted U-shaped relationship, which peaked in assessments with a predicted median survival between 6 and 12 months. Among the three highest mortality-risk profiles, 42.7%, 53.3% and 56.1% visited the ED at least once. The median number of days in the ED was 1 (IQR: 1-2) for all three highest risk profiles. With respect to hospitalizations, 36.9%, 42.1% and 43.3% of assessments in the three highest-risk profiles were admitted to an acute care hospital at least once within 6 months of an interRAI Home Care assessment. The median number of days in hospital was 9 (IQR: 4-19), 10 (IQR: 4-21.5) and 10 (IQR: 5-21), respectively. Lastly, among the three highest mortality risk profiles, 18.2%, 23.1% and 24.2% were admitted to a long-term care home, respectively. The corresponding median number of days spent in long-term care homes was 30 (IQR: 83-137), 11(IQR: 47-154) and 119 days (IQR: 53-157), respectively.



eFigure 6. Place of death, stratified by mortality-risk profile

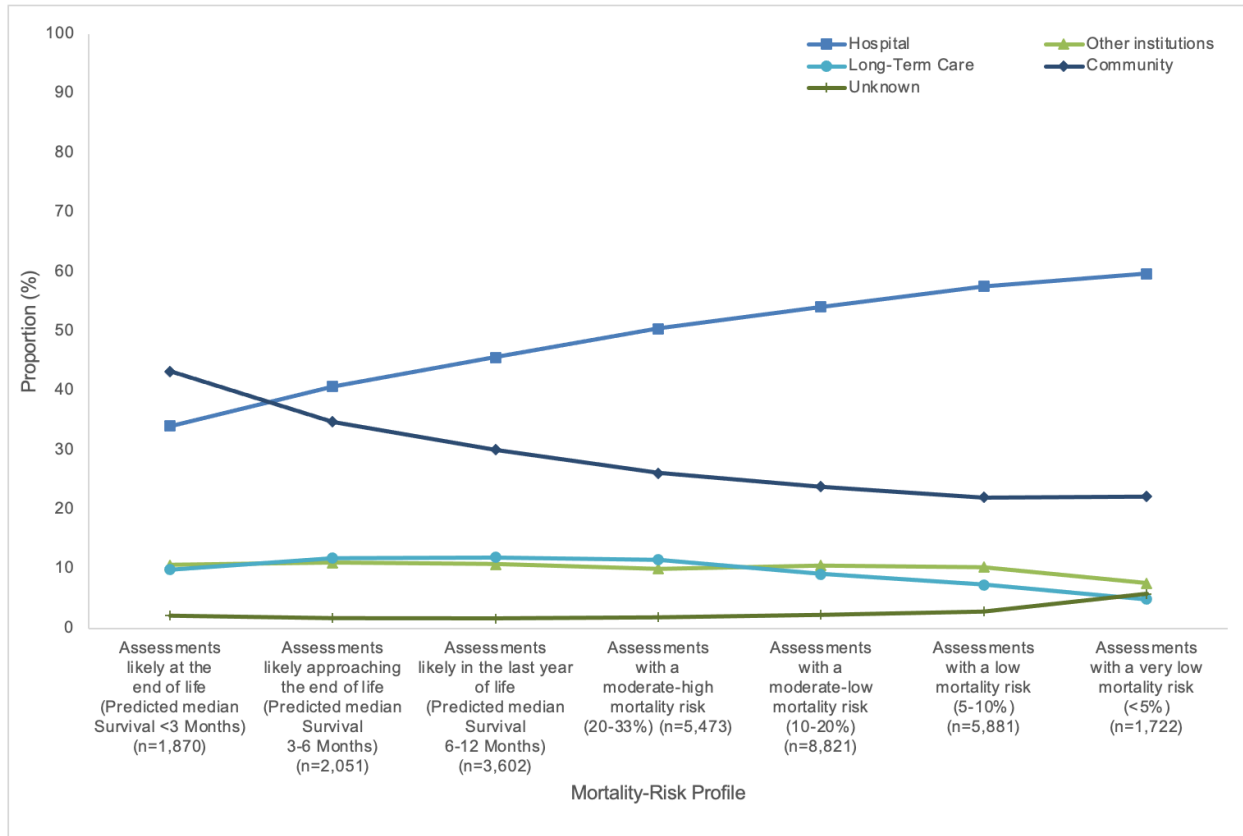

Supplement: 221513-res-1-at.pdf [file 221513-res-1-at.pdf]
